# Supplementary material for: Distribution of acid-sensing ion channel subunits in human sensory neurons contrasts with that in rodents
Source: PubMed Central journal article supplement (PMC9629378; doi:10.1093/braincomms/fcac256), 2022-11-02
Supplement: fcac256_supplementary_data.pdf [file fcac256_supplementary_data.pdf]

## Supplementary figures

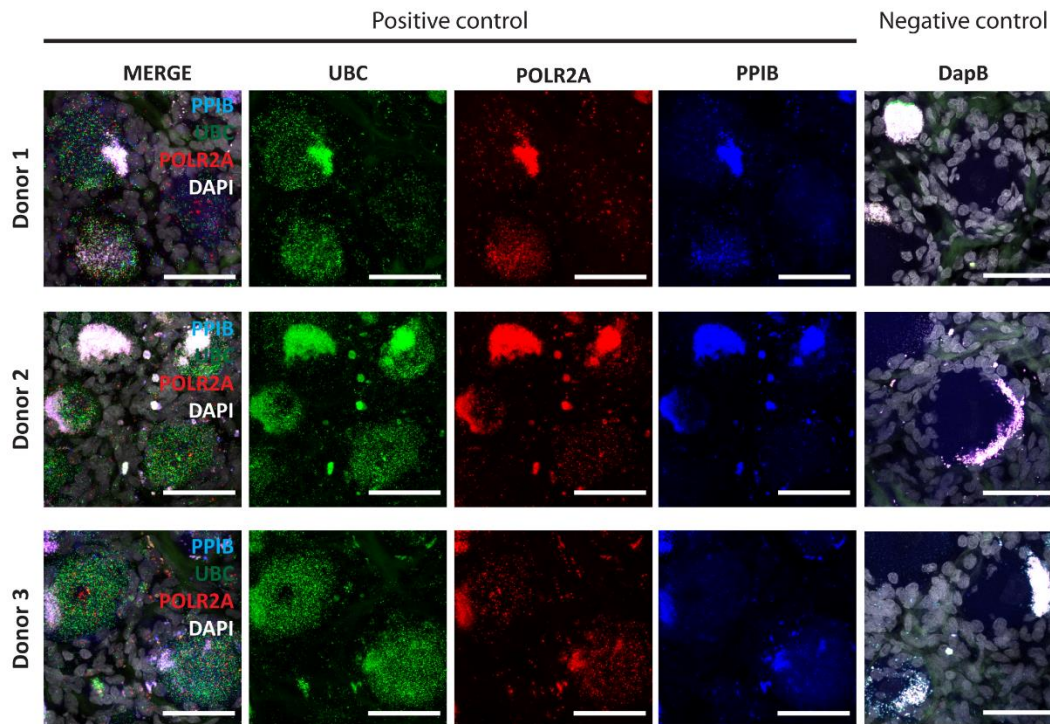

### Supplementary figure 1: Validation of the RNAscope approach.

The signal levels of positive control probes targeting eukaryotic housekeeping genes *POLR2A* (RNA Polymerase II Subunit A), *PPIB* (peptidylprolyl isomerase B), and *UBC* (Ubiquitin C), were consistent with our expectations. More specifically, *UBC* was expected to have the highest expression, *POLR2A* has moderate to low expression levels, and *PPIB* has moderate to high expression levels. The negative control probe (*DapB* - dihydrodipicolinate reductase of *Bacillus subtilis* strain) did not show any signal. For all experiments, human DRG sections from three donors were used. Scale bar = 50  $\mu$ m.

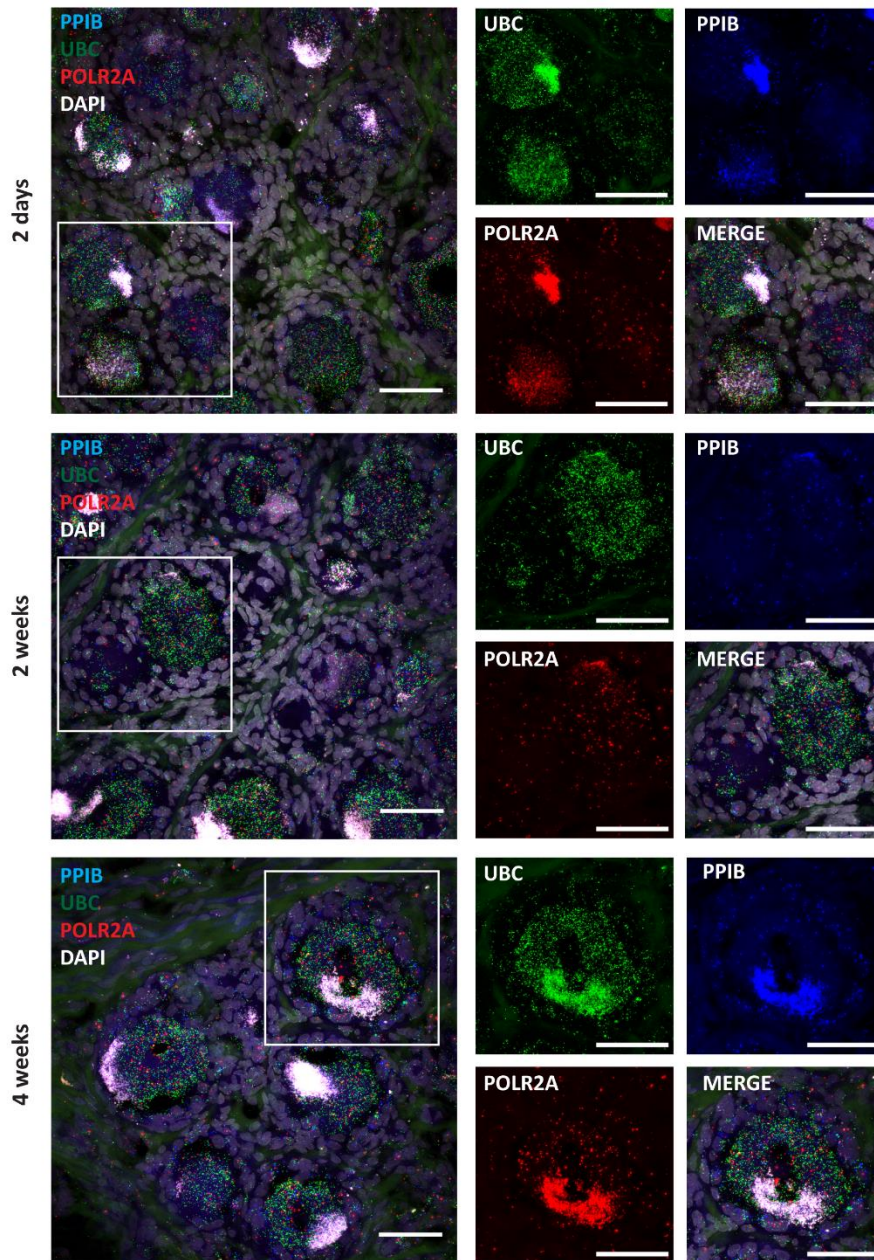

**Supplementary figure 2: Validation of the RNA quality after a month of storage in 100% ethanol at -30°C.**

Representative images of human DRG sections two days, two weeks, and four weeks after sequential dehydration and storage in 100% ethanol at -30°C. The region within the white square is further highlighted on the right-side images. The signal is from control probes targeting eukaryotic housekeeping genes *POLR2A* (RNA Polymerase II Subunit A), *PPIB* (peptidylprolyl isomerase B), and *UBC* (Ubiquitin C). Scale bar = 50  $\mu$ m

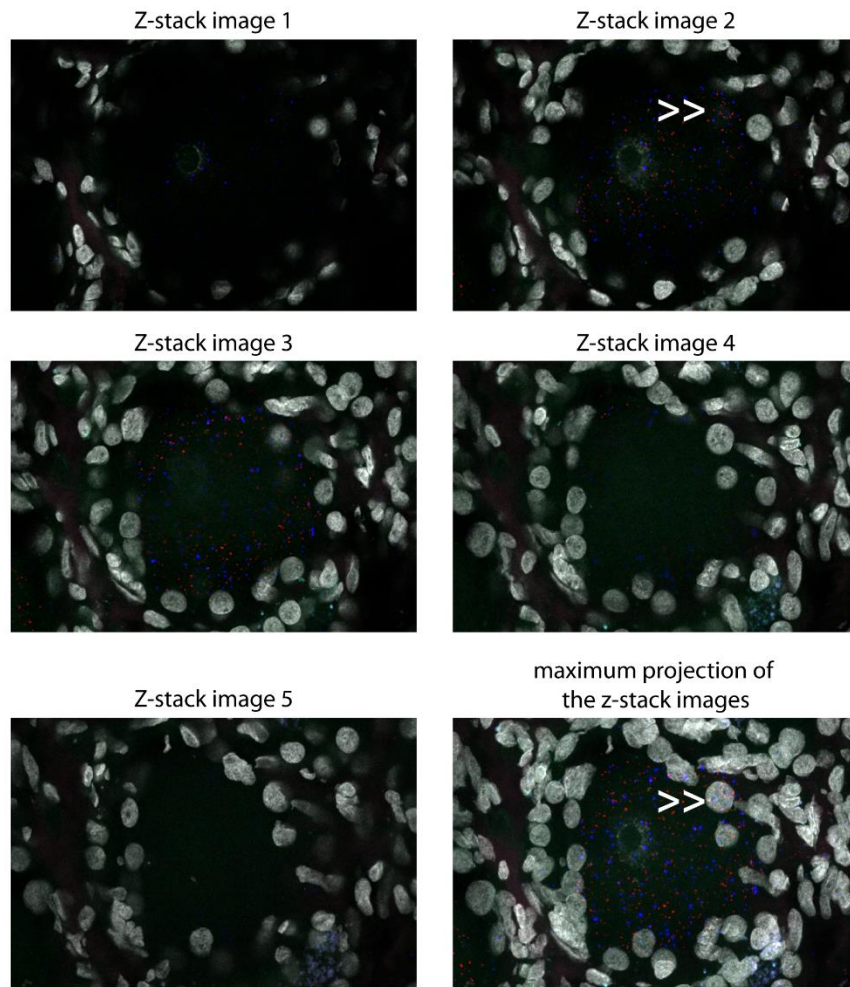

**Supplementary figure 3: Example of stack images and final maximum projection image.**

Representative example of RNAscope signal (Acid-Sensing Ion Channel 1 in blue and receptor tyrosine kinase RET in red). This image is a zoomed-in image from Figure A1. The double arrow points towards RNAscope signal that is located inside the neuron in Z-stack image 2 and not in the satellite cells as it appears in the final maximum projection image.

**Supplementary table 1**

Below we are providing the number of neurons analysed per donor for each one of the five experiments conducted for this paper and presented in the Figures.

|         | Figure 1C          | Figure 1D          |             |           |
|---------|--------------------|--------------------|-------------|-----------|
|         | ASIC1 <sup>+</sup> | ASIC1 <sup>+</sup> | ASIC1/CALCA | ASIC1/RET |
| Donor 1 | 368                | 368                | 242         | 358       |
| Donor 2 | 288                | 288                | 120         | 275       |
| Donor 3 | 370                | 370                | 222         | 365       |
| Total   | 1026               | 1026               | 584         | 998       |

|         | Figure 2C          | Figure 2D          |             |           |
|---------|--------------------|--------------------|-------------|-----------|
|         | ASIC2 <sup>+</sup> | ASIC2 <sup>+</sup> | ASIC2/CALCA | ASIC2/RET |
| Donor 1 | 140                | 140                | 115         | 136       |
| Donor 2 | 164                | 164                | 74          | 157       |
| Donor 3 | 154                | 154                | 110         | 151       |
| Total   | 458                | 458                | 299         | 444       |

|         | Figure 3C          | Figure 3D          |             |           |
|---------|--------------------|--------------------|-------------|-----------|
|         | ASIC3 <sup>+</sup> | ASIC3 <sup>+</sup> | ASIC3/CALCA | ASIC3/RET |
| Donor 1 | 408                | 408                | 295         | 397       |
| Donor 2 | 346                | 346                | 269         | 344       |
| Donor 3 | 334                | 334                | 175         | 332       |
| Total   | 1088               | 1088               | 739         | 1073      |

|         | Figure 4D    | Figure 4E |       |       |
|---------|--------------|-----------|-------|-------|
|         | total number | ASIC1     | ASIC2 | ASIC3 |
| Donor 1 | 400          | 383       | 120   | 300   |
| Donor 2 | 378          | 343       | 130   | 234   |
| Donor 3 | 390          | 353       | 170   | 327   |
| Total   | 1168         | 1079      | 420   | 861   |

|         | Figure 5C                                | Figure 5D          | Figure 5E   |             |             |
|---------|------------------------------------------|--------------------|-------------|-------------|-------------|
|         | ASIC1 <sup>+</sup> or ASIC3 <sup>+</sup> | ASIC2 <sup>+</sup> | ASIC1/TRPV1 | ASIC2/TRPV1 | ASIC3/TRPV1 |
| Donor 1 | 356                                      | 118                | 294         | 106         | 214         |
| Donor 2 | 422                                      | 165                | 368         | 138         | 274         |
| Donor 3 | 383                                      | 186                | 321         | 176         | 304         |
| Total   | 1161                                     | 469                | 983         | 420         | 792         |
